# Supplementary material for: Transcriptional profiling identifies an androgen receptor activity-low, stemness program associated with enzalutamide resistance
Source: PubMed Central journal article supplement — Proc Natl Acad Sci U S A. 2020 May 18;117(22):12315–23. doi: 10.1073/pnas.1922207117 (PMC7275746; doi:10.1073/pnas.1922207117), 2020-05-18

**Table S1**

| <b>Supplementary Table 1. Baseline Patient Characteristics</b> |                                  |
|----------------------------------------------------------------|----------------------------------|
| <b>Characteristic</b>                                          | <b>All patients<br/>(n = 36)</b> |
| <b>Age (year)</b>                                              |                                  |
| Median                                                         | 71.9                             |
| Range                                                          | 56.6 to 88.7                     |
| <b>Total Gleason Score, n (%)</b>                              |                                  |
| 6                                                              | 2 (5.6%)                         |
| 7                                                              | 14 (38.9%)                       |
| 8                                                              | 3 (8.3%)                         |
| 9                                                              | 11 (30.6%)                       |
| Unavailable                                                    | 6 (16.7%)                        |
| <b>Metastatic Sites at Time of Biopsy, n (%)</b>               |                                  |
| Bone                                                           | 26 (72.2%)                       |
| Lung                                                           | 2 (5.6%)                         |
| Liver                                                          | 0 (0.0%)                         |
| Visceral (other than lung and liver)*                          | 1 (2.8%)                         |
| Lymph nodes                                                    | 7 (19.4%)                        |
| <b>ECOG performance status score, n (%)</b>                    |                                  |
| 0                                                              | 21 (58.3%)                       |
| 1                                                              | 15 (41.7%)                       |
| 2 to 4                                                         | 0 (0.0%)                         |
| <b>PSA</b>                                                     |                                  |
| Median                                                         | 36.6                             |
| Range                                                          | 1.8 to 2137.3                    |

**Table S2**

| <b>Study ID</b> | <b>Nuclear AR IHC Score</b> |
|-----------------|-----------------------------|
| <b>210</b>      | 3+                          |
| <b>232</b>      | 3+                          |
| <b>245</b>      | 3+                          |
| <b>249</b>      | 3+                          |
| <b>253</b>      | 3+                          |
| <b>228</b>      | 3+                          |
| <b>237</b>      | 3+                          |
| <b>250</b>      | 3+                          |
| <b>227</b>      | 3+                          |
| <b>214</b>      | 3+                          |
| <b>208</b>      | 3+                          |
| <b>223</b>      | 3+                          |
| <b>215</b>      | 3+                          |
| <b>230</b>      | 3+                          |
| <b>207</b>      | 3+                          |
| <b>248</b>      | 3+                          |
| <b>231</b>      | 3+                          |
| <b>246</b>      | 3+                          |
| <b>229</b>      | 3+                          |
| <b>252</b>      | 3+                          |
| <b>240</b>      | 3+                          |

 Nonresponders  Responders

**Figure S1**

**Consort Flow Diagram**

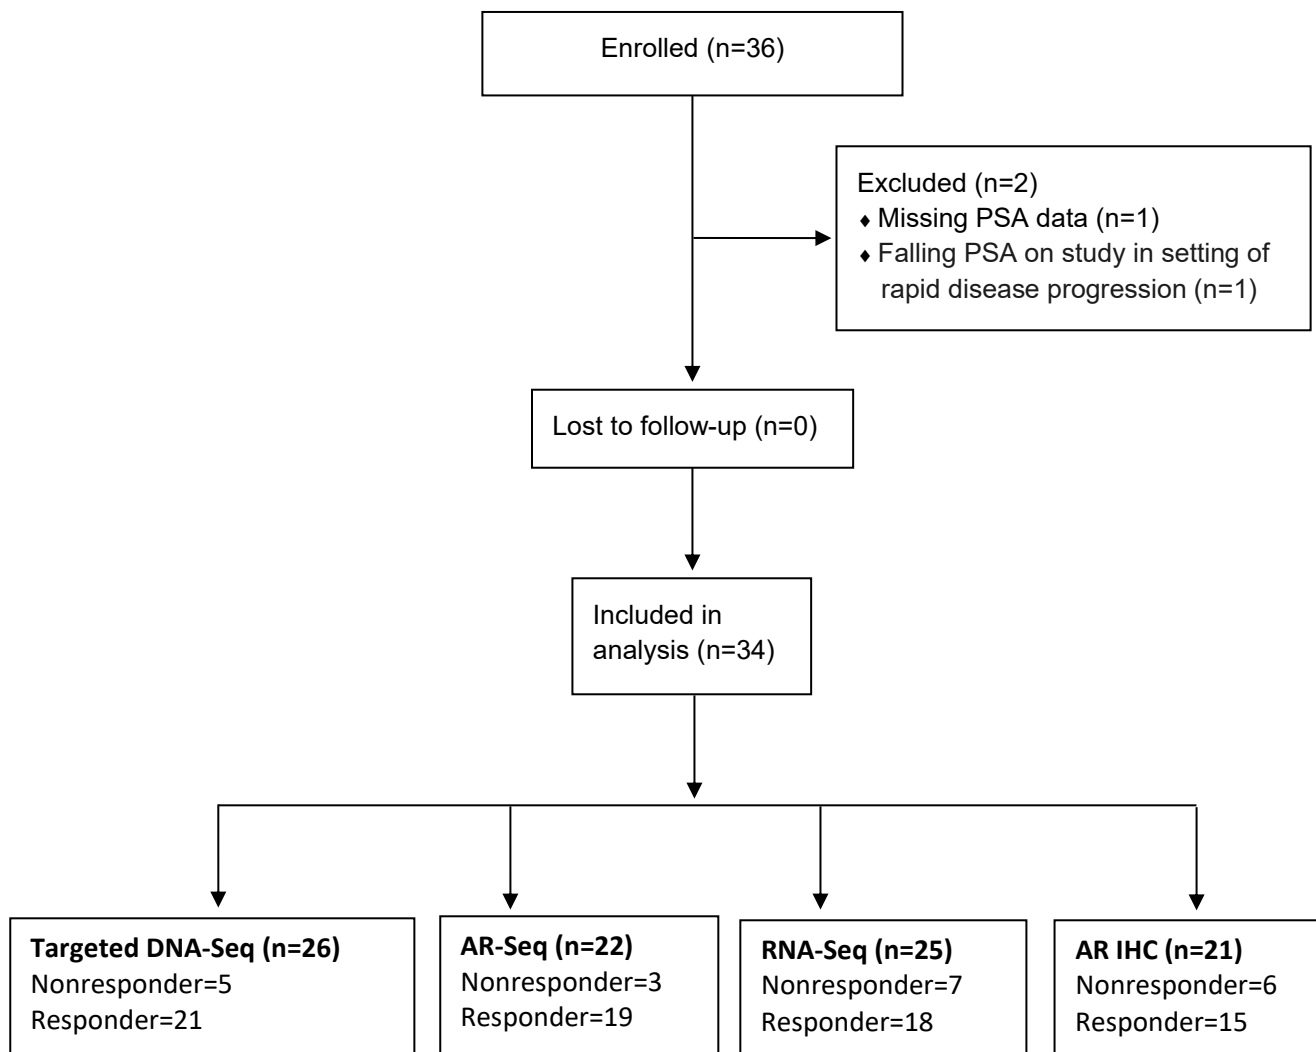

**Figure S2**

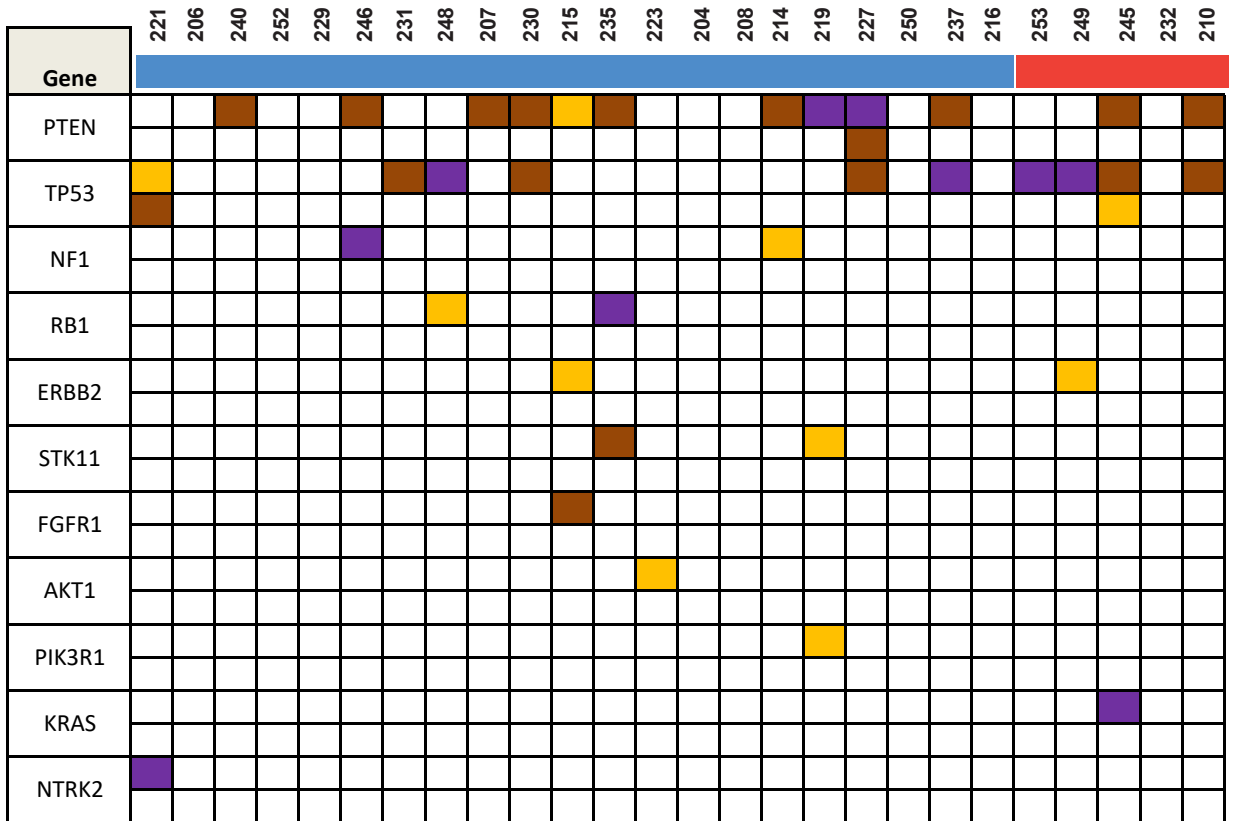

**Alterations**

- Frameshift or stop gain mutation
- Missense mutation
- Copy number loss
- No abnormality

**Response**

- Responders
- Nonresponders

Figure S3

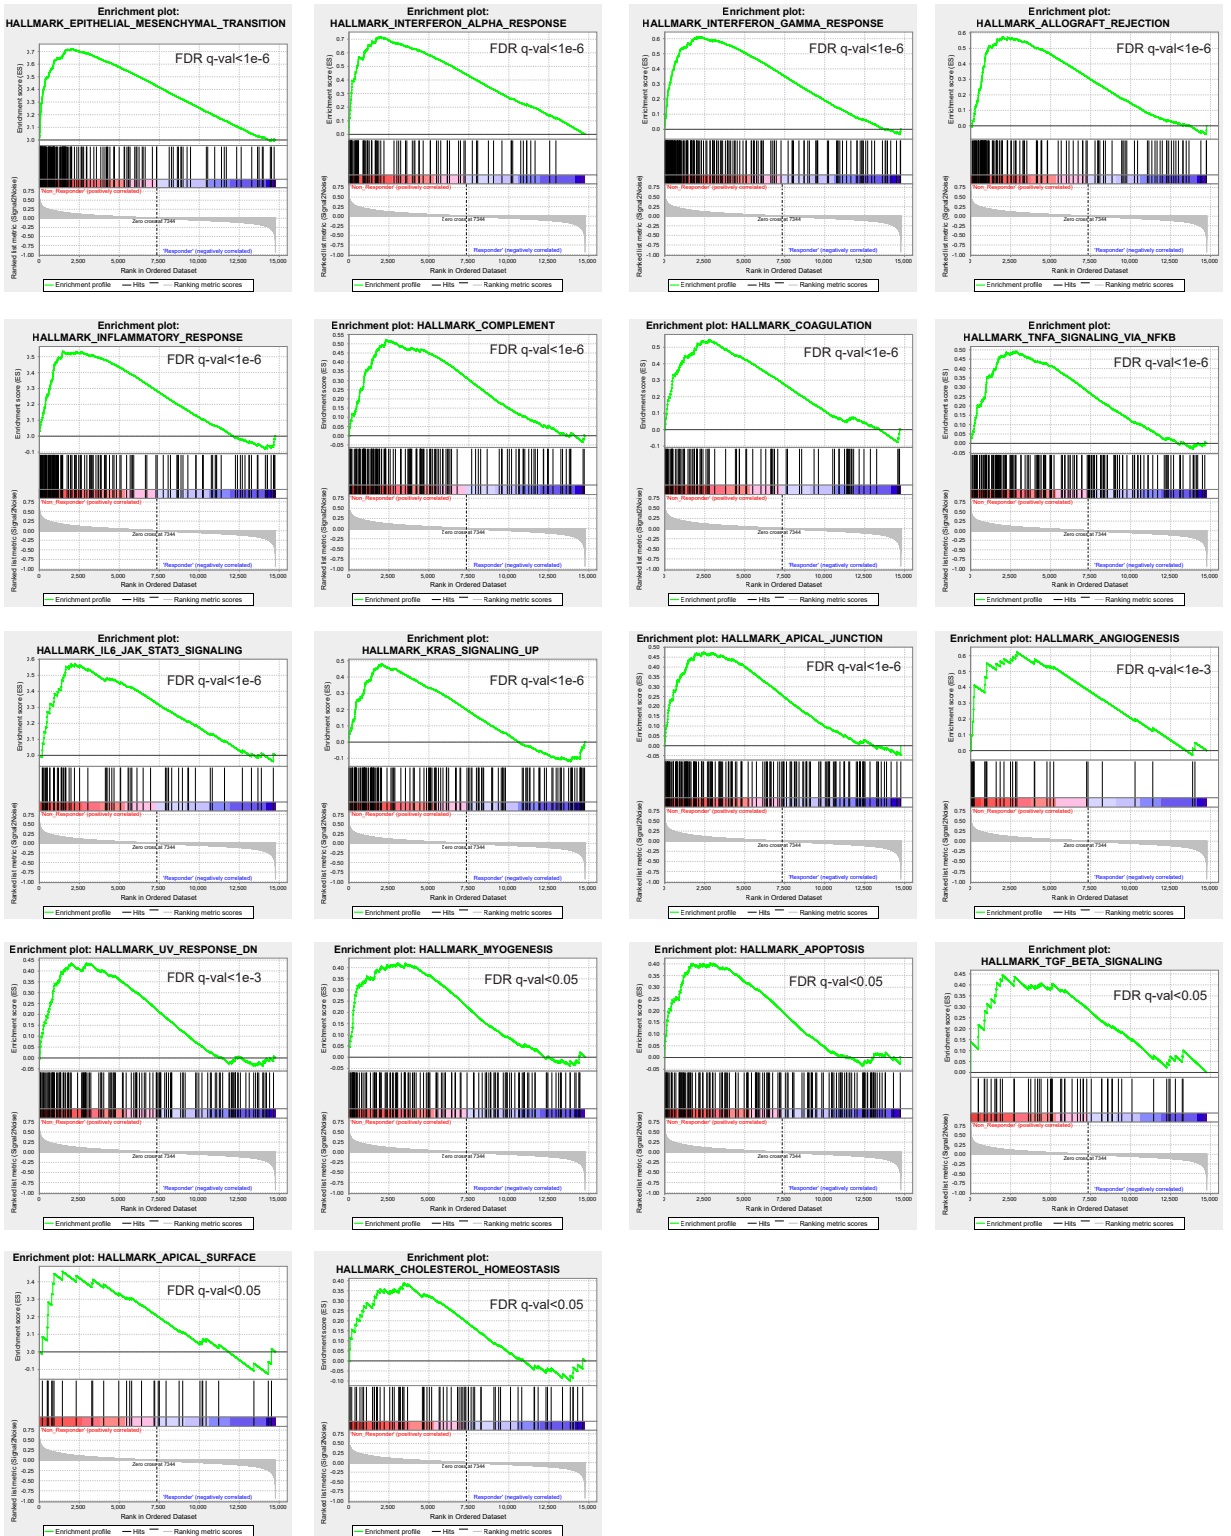

Figure S4

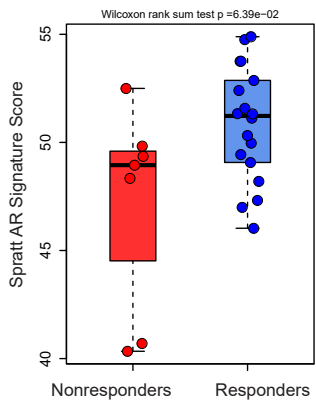

Supplement: pnas.1922207117.sapp.pdf [file pnas.1922207117.sapp.pdf]
